# Supplementary material for: Sub-angiographic peripheral emboli in high resolution DWI after endovascular recanalization
Source: PubMed Central journal article supplement (PMC7184052; doi:10.1007/s00415-020-09719-1), 2020-01-29
Supplement: 415_2020_9719_MOESM1_ESM.pdf [file 415_2020_9719_MOESM1_ESM.pdf]

## **SUPPLEMENTAL MATERIAL**

**Peripheral emboli in high resolution DWI after complete endovascular recanalization**

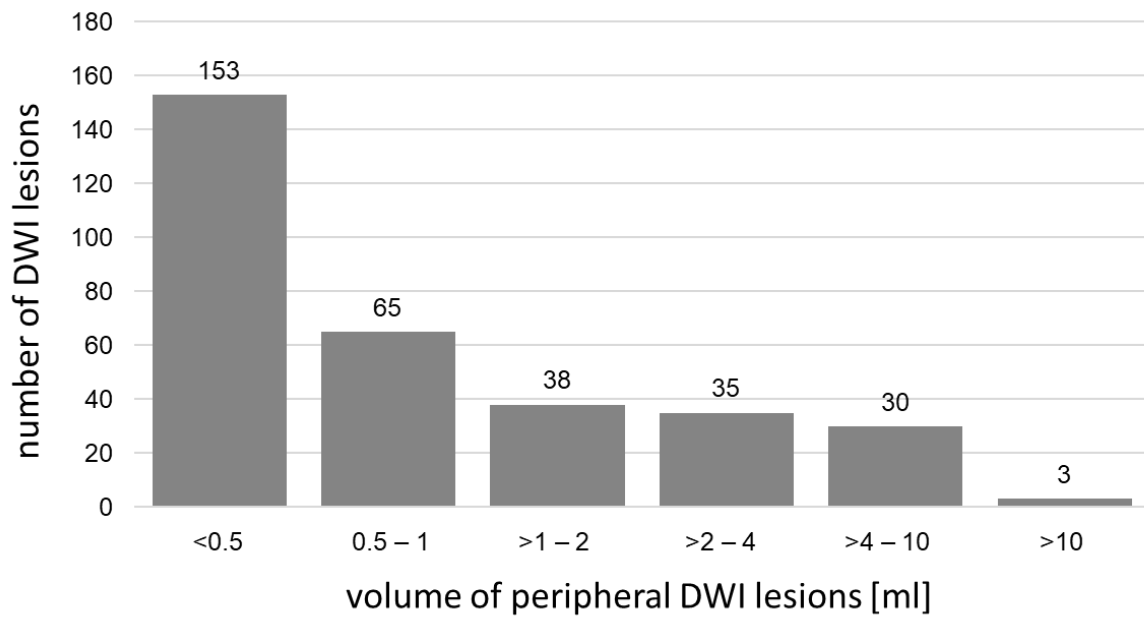

**Figure I:** Bar chart showing the distribution of peripheral DWI lesions sorted by their volume. 47.2% of peripheral lesions were smaller than 50ml.

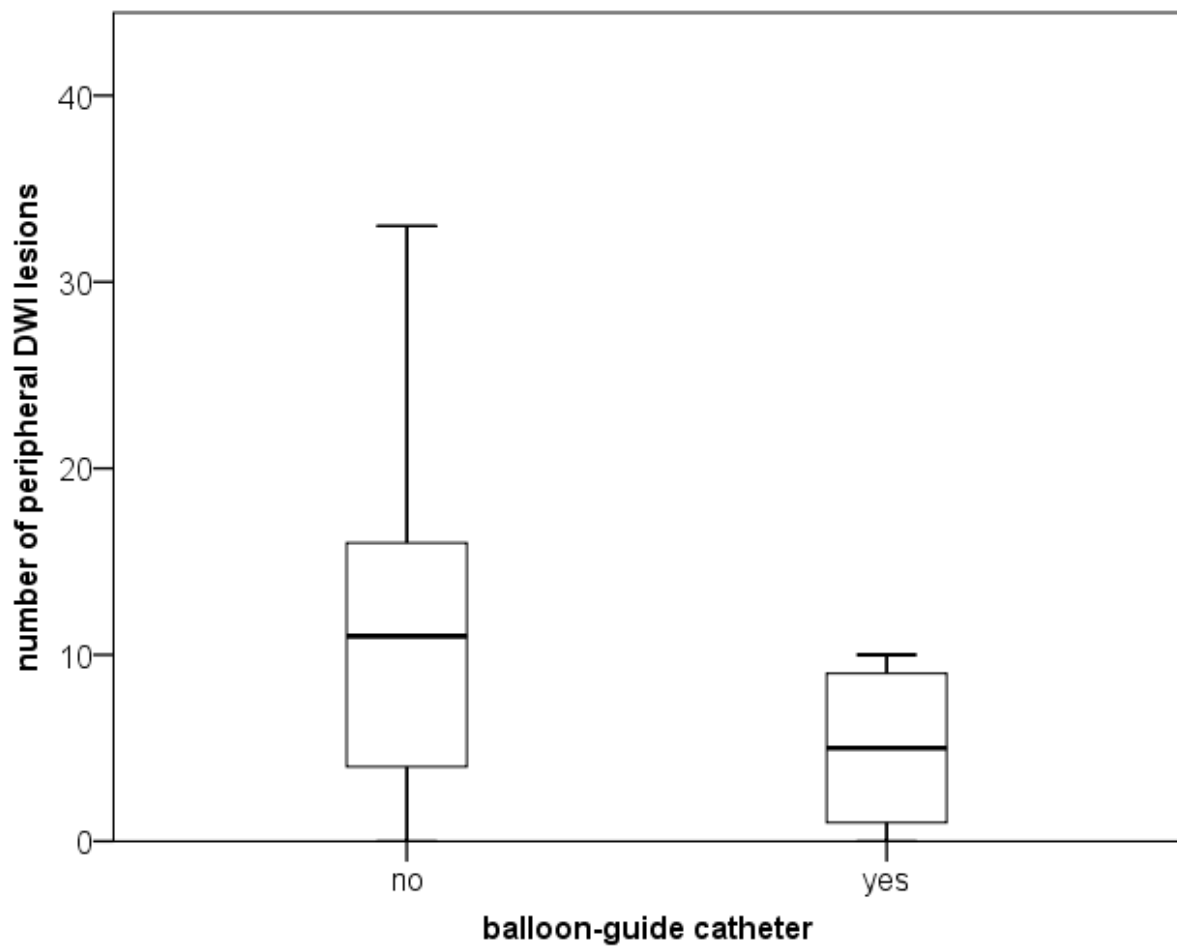

**Figure II:** Box plot showing a tendency towards a lower number of peripheral lesions on high resolution DWI with the use of a balloon-guide catheter (n=5; median 5, IQR 0.5-9.5) compared to not using a balloon-guided catheter (n=21; median 11, IQR 4-21.5). The difference was not statistically significant (p=0.057).
